# Supplementary material for: Higher Na+-Ca2+ Exchanger Function and Triggered Activity Contribute to Male Predisposition to Atrial Fibrillation
Source: MDPI journal article supplement (doi:10.3390/ijms231810724), 2022-09-14
Supplement: s1 [file s1]

This pdf includes:

- Supplemental methods
- Supplemental Figures 1 to 4
- Supplemental Tables 1 to 3

### **Supplemental methods:**

**I<sub>CaL</sub> inactivation protocols.** The voltage dependence of I<sub>CaL</sub> steady-state inactivation was measured using a two-step voltage-clamp protocol consisting of a first 500-ms inactivating step at selected potentials (from -80 mV to 20 mV, in 5-10 mV increments), followed by a 250-ms test step to 0 mV. In addition, a 10-ms prepulse at -50 mV was added before the 250-ms test step to inactivate I<sub>Na</sub>. The current amplitude at each first pulse potential was normalized to the maximal amplitude of the current (I/I<sub>max</sub>) and plotted as a function of the inactivating prepulse potential. Data were fitted to a Boltzmann equation:  $I/I_{\max} = 1/[1 + \exp((V_m - V_{1/2})/S_{1/2})]$ , where V<sub>1/2</sub> represents the membrane potential (V<sub>m</sub>) when 50% of the channel are inactivated and S<sub>1/2</sub> is the mid-point slope factor. Protocol for the recovery from inactivation of I<sub>CaL</sub> consisted of a holding potential of -50 mV, two 250-ms test steps at 0 mV separated by a recovery step at -50 mV lasting from 10 ms to 2000 ms.

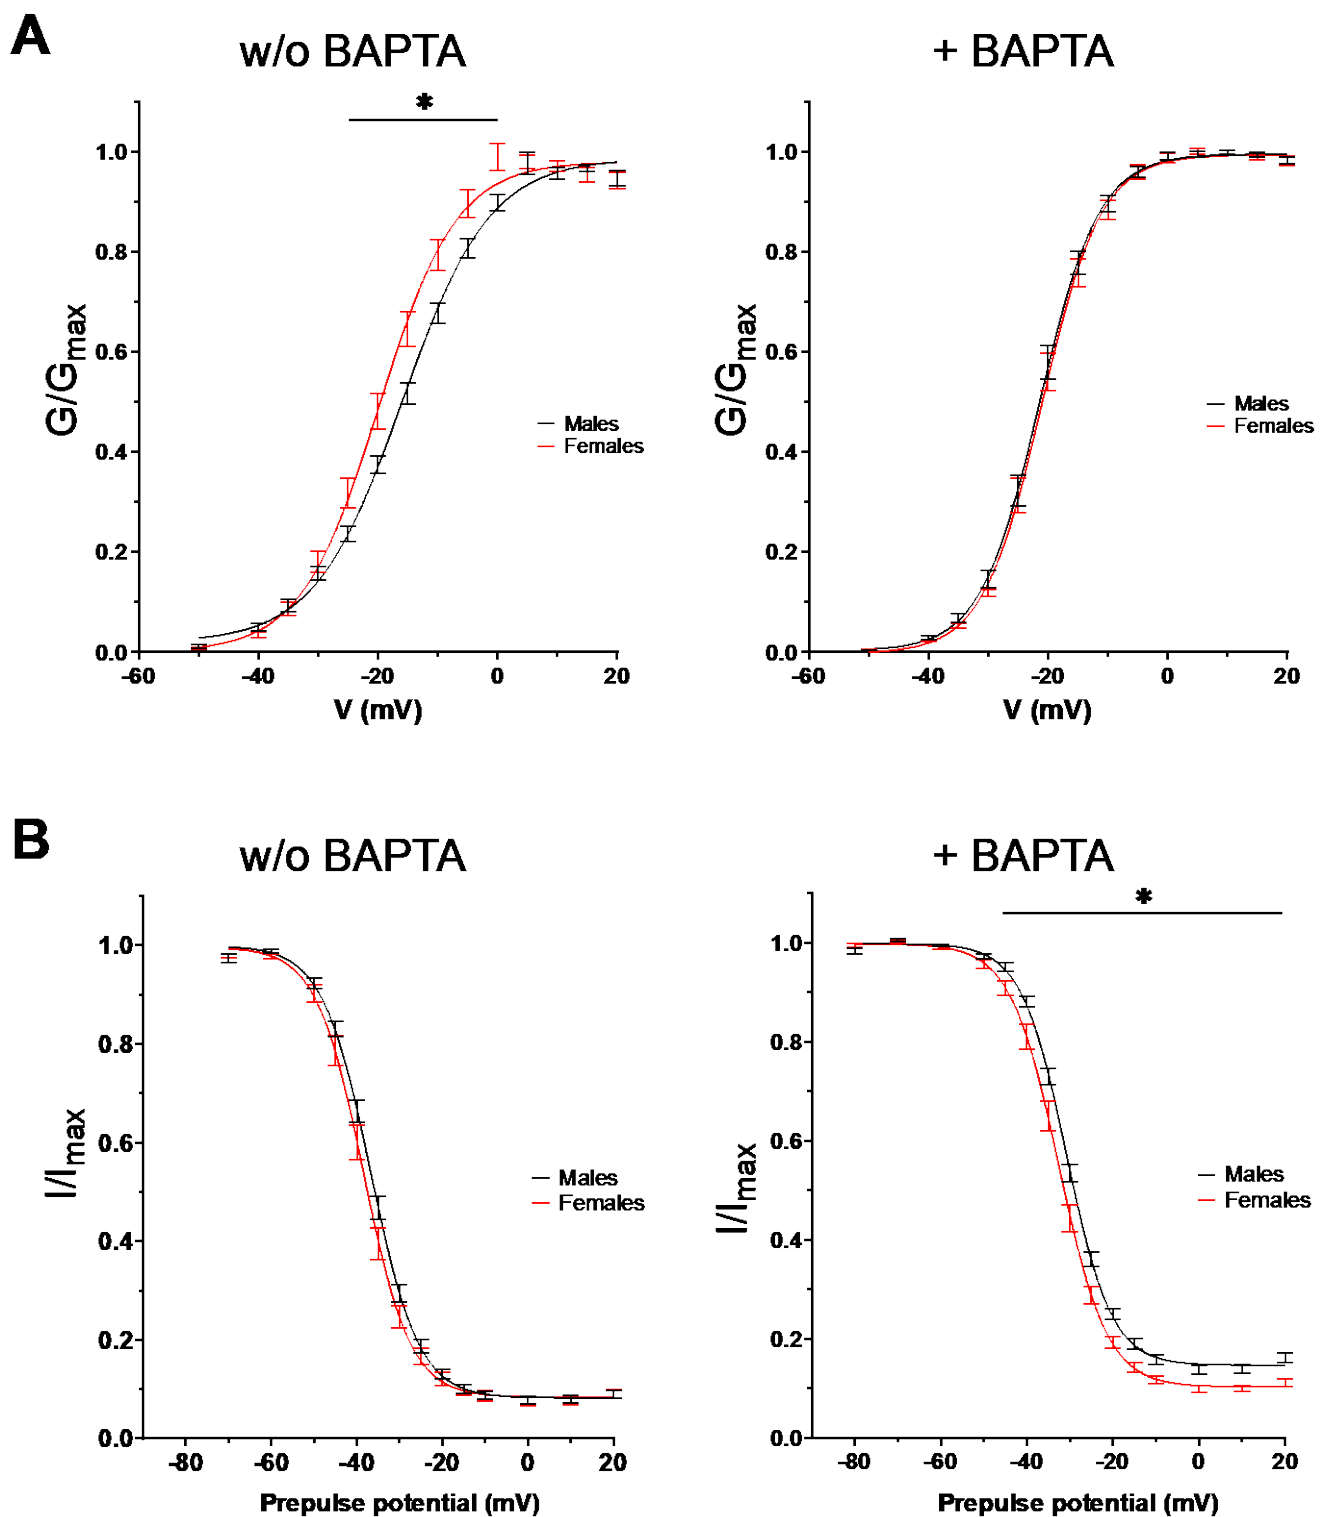

Supplemental Figure S1. Steady-state activation and inactivation of  $I_{CaL}$  in absence or presence of BAPTA, in male and female mouse atrial myocytes. A. Left. Steady-state activation curve for  $I_{CaL}$  shows a positive shift in males in absence of BAPTA and a slower activation slope in comparison to females. Right. There is no sex difference in the voltage dependence of the steady-state activation in presence of BAPTA. B. Steady-state inactivation of  $I_{CaL}$  current in male and female atrial myocytes without (left) and with BAPTA (right). Numerical values for  $I_{CaL}$  kinetics are provided in supplemental table S3.

**A**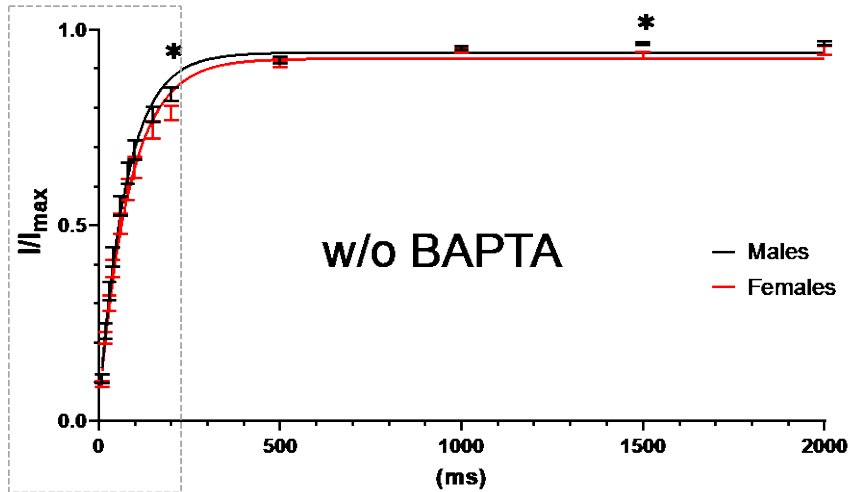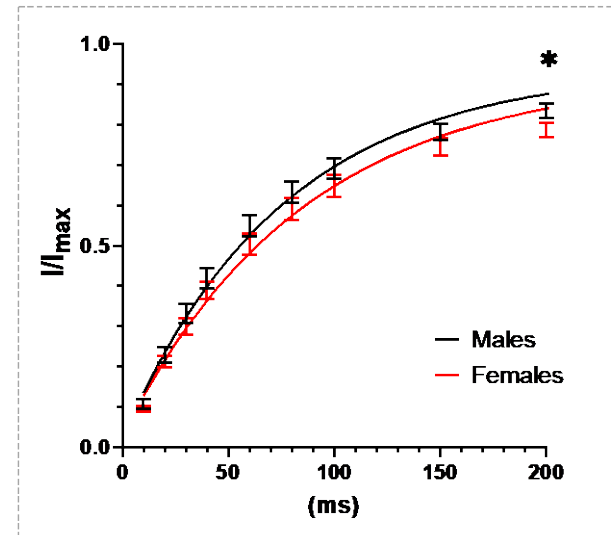**B**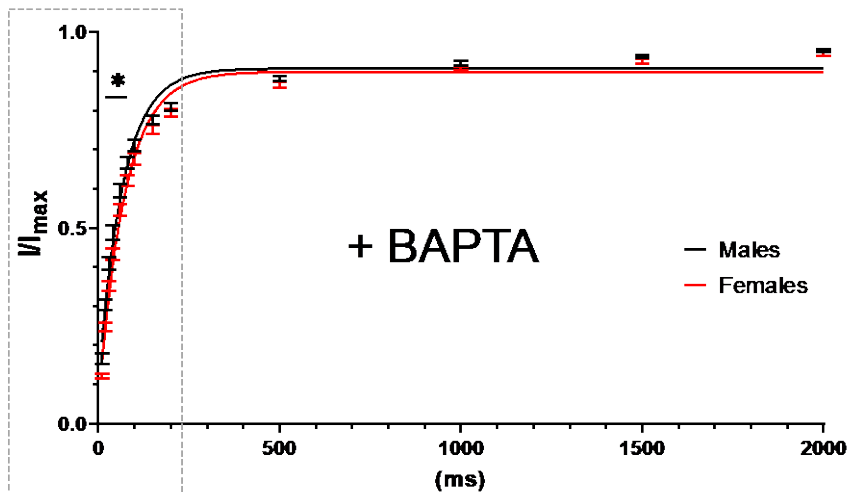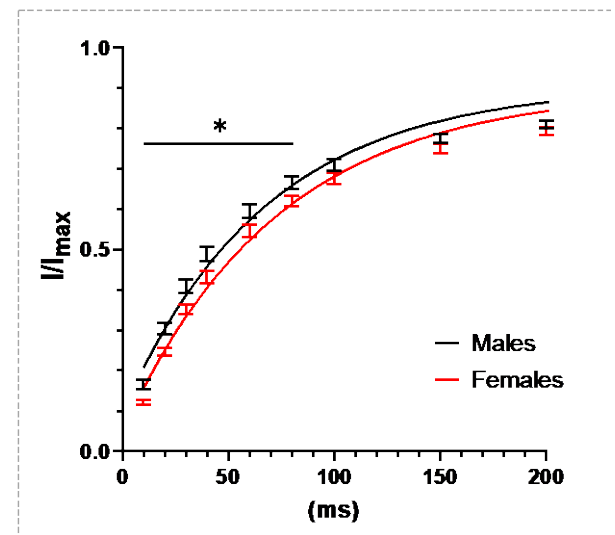

Supplemental Figure S2. Recovery from inactivation of  $I_{CaL}$  in absence (A) and presence (B) of BAPTA in male and female mouse atrial myocytes. Left panel shows mean values of relative current against interpulse interval for the entire time scale (10 to 2000 ms). Right panel presents the data over an expanded time scale (10 to 200 ms). Solid lines are best-fit single exponential functions. Rate constant for recovery from inactivation without BAPTA, at holding potential of -50 mV were  $0.0132 \text{ ms}^{-1}$  (95% CI:  $0.0120$  to  $0.01462 \text{ ms}^{-1}$ ,  $n=23$ ,  $N=3$ ) for males and  $0.0136 \text{ ms}^{-1}$  (95% CI  $0.0117$  to  $0.0130 \text{ ms}^{-1}$ ,  $n=13$ ,  $N=2$ ) for females. In presence of BAPTA, these values were  $0.0148 \text{ ms}^{-1}$  (95% CI:  $0.0135$  to  $0.0162 \text{ ms}^{-1}$ ,  $n=24$ ,  $N=3$ ) for males and  $0.0136$  (95% CI  $0.0127$  to  $0.0147 \text{ ms}^{-1}$ ,  $n=18$ ,  $N=2$ ) for females.

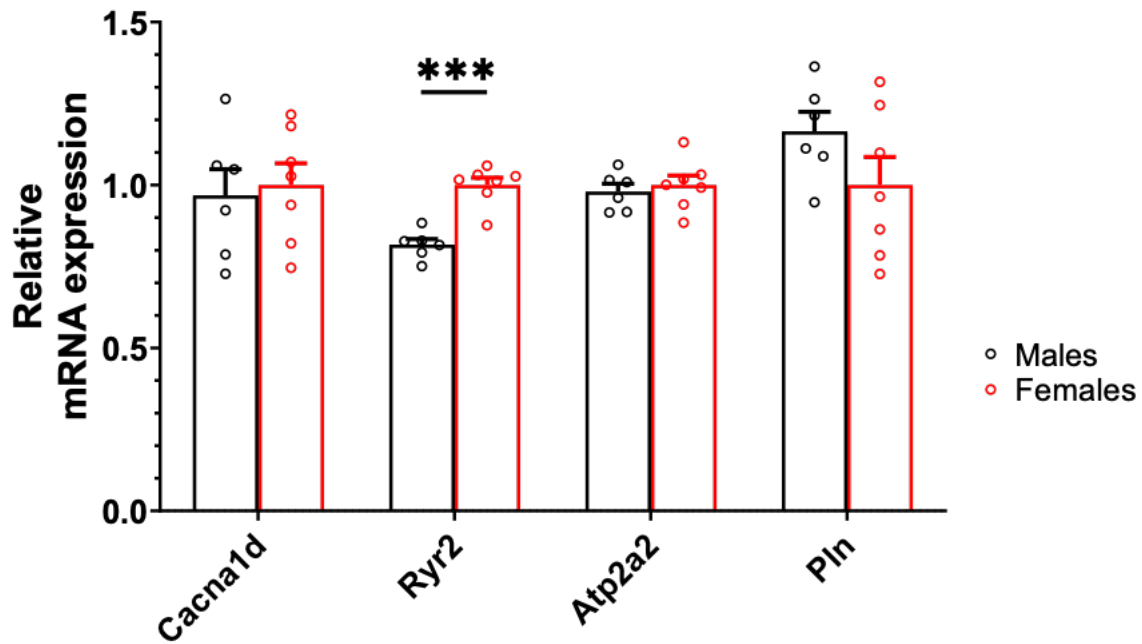

Supplemental Figure S3. Relative mRNA expression of  $\text{Ca}^{2+}$  handling proteins in mouse atria. Scatter plots displaying mRNA expression in left atria of male and female mice for the following genes: *Cacna1d* (coding for  $\text{Ca}_v1.3$ ), *Ryr2* (coding for Ryanodine Receptor 2) *Atp2a2* (coding for SERCA2A) and *Pln* (coding for Phospholamban) (M: N = 6; F: N = 7). Sex differences were only seen in *Ryr2* expression (M:  $0.82 \pm 0.02$ , F:  $1.00 \pm 0.02$ ,  $p = 0.00007$ ).

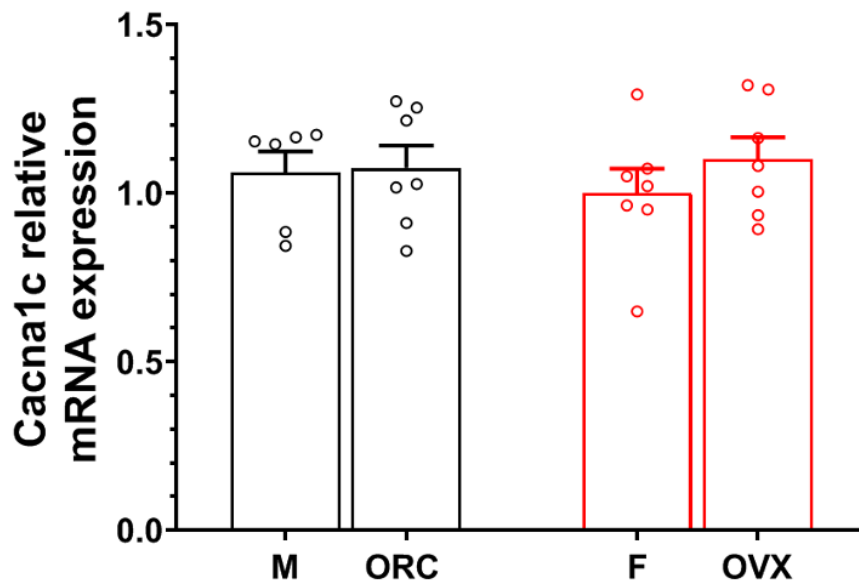

Supplemental Figure S4. Atrial *Cacna1c* gene expression is not affected by orchiectomy (ORC) and ovariectomy (OVX) in mice. Scatter plot shows no difference in the expression of *Cacna1c* in ORC and OVX mice compared to their respective controls (N = 6-7/ group).

Supplemental Table S1. Primer sequences used for qPCR analysis in mice

| Target gene    | Forward primer sequence           | Reverse primer sequence        |
|----------------|-----------------------------------|--------------------------------|
| <i>Hprt1</i>   | TGA ATC ACG TTT GTG TCA TTA GTG A | TTC AAC TTG CGC TCA TCT TAG G  |
| <i>Cacna1c</i> | CGT TCT CAT CCT GCT CAA CAC C     | GAG CTT CAG GAT CAT CTC CAC TG |
| <i>Cacna1d</i> | CTA CCG TTG CAC AGA TGA AGC C     | TCA CGG ACC ACA GGA CTG TCA A  |
| <i>Slc8a1</i>  | AGA GGA GGA GAG GCG CAT TG        | CGC TGA CAG TGA TGG CTT CG     |
| <i>Ryr2</i>    | CAT GAG AAT GCT GGC CTT GT        | TAG CAG TAT CGC TGG AGG TT     |
| <i>Atp2a2</i>  | CTG GAG GTT AAT ACT GAG ATC GGC A | TCC AGA CTG CAA TGC AAA TGA G  |
| <i>Pln</i>     | TGC CCA GCT AAG CTC CCA TA        | GCT GGC AAG TTC CTT TGG TC     |

Supplemental Table S2. Primer sequences used for qPCR analysis in humans

| Target gene    | Forward primer sequence    | Reverse primer sequence      |
|----------------|----------------------------|------------------------------|
| <i>HPRT1</i>   | TGC TGA CCT GCT GGA TTA CA | TTT ATG TCC CCT GTT GAC TGGT |
| <i>CACNA1C</i> | GCG CCG CAG TCA AGT CTA AT | AGG AGC ATC TCT GCC GTG AA   |
| <i>SLC8A1</i>  | GTG TTC GTC GCA CTT GGA AC | TGC CCG TGA CGT TAC CTA TG   |

Supplemental Table S3. Activation and inactivation kinetics of  $I_{CaL}$  in absence and presence of BAPTA in left atrial myocytes of male and female mice

|                                     |           | Without BAPTA        |                      |                 | With 10 mM BAPTA   |                    |                 |
|-------------------------------------|-----------|----------------------|----------------------|-----------------|--------------------|--------------------|-----------------|
|                                     |           | Males                | Females              | <i>p</i> -value | Males              | Females            | <i>p</i> -value |
| Steady-state activation             | $V_{1/2}$ | <b>-15.8 ± 0.6</b>   | <b>-19.1 ± 0.9</b>   | <b>0.002*</b>   | -21.3 ± 0.6        | -20.5 ± 0.7        | 0.40            |
|                                     | Slope     | 7.7 ± 0.5            | 6.6 ± 0.3            | 0.086           | 4.7 ± 0.3          | 4.5 ± 0.25         | 0.52            |
|                                     | n         | 22                   | 21                   |                 | 26                 | 25                 |                 |
| Steady-state inactivation           | $V_{1/2}$ | <b>-36.8 ± 0.5</b>   | <b>-38.5 ± 0.8</b>   | <b>0.05*</b>    | <b>-30.8 ± 0.4</b> | <b>-32.7 ± 0.7</b> | <b>0.02*</b>    |
|                                     | Slope     | 5.4 ± 0.1            | 5.2 ± 0.2            | 0.23            | 5.2 ± 0.1          | 5.3 ± 0.1          | 0.47            |
|                                     | n         | 24                   | 14                   |                 | 24                 | 22                 |                 |
| Macroscopic inactivation (at -5 mV) | Tau       | 7.2 ± 0.3            | 6.5 ± 0.2            | 0.09            | 10.3 ± 0.4         | 10.0 ± 0.4         | 0.53            |
|                                     | R10       | <b>0.29 ± 0.02</b>   | <b>0.25 ± 0.01</b>   | <b>0.05*</b>    | 0.44 ± 0.01        | 0.42 ± 0.01        | 0.35            |
|                                     | R20       | <b>0.14 ± 0.01</b>   | <b>0.11 ± 0.01</b>   | <b>0.005*</b>   | 0.20 ± 0.01        | 0.19 ± 0.01        | 0.65            |
|                                     | R40       | <b>0.060 ± 0.005</b> | <b>0.042 ± 0.003</b> | <b>0.002*</b>   | 0.068 ± 0.003      | 0.068 ± 0.003      | 0.98            |
|                                     | n         | <b>22</b>            | <b>21</b>            |                 | <b>26</b>          | <b>24</b>          |                 |
